# Supplementary material for: Essential Oils of Mentha arvensis and Cinnamomum cassia Exhibit Distinct Antibacterial Activity at Different Temperatures In Vitro and on Chicken Skin
Source: MDPI journal article supplement (doi:10.3390/foods12213938), 2023-10-27
Supplement: s1 [file s1]

**Table S2.** *S. typhimurium* bacteria counts (lg CFU/mL) after incubation with MEO and CEO at different temperatures. Each EO was premixed with 75% ethanol at a 1:1 ratio (v/v). MIC of each EO was diluted 10-fold, 100-fold, and 1000-fold with LB broth.

| MEO         |  |             |             |             |             |             |             |             |             |             |
|-------------|--|-------------|-------------|-------------|-------------|-------------|-------------|-------------|-------------|-------------|
|             |  | 4°C         |             |             | 25°C        |             |             | 37°C        |             |             |
| min<br>fold |  | 10          | 20          | 40          | 10          | 20          | 40          | 10          | 20          | 40          |
|             |  |             |             |             |             |             |             |             |             |             |
| 1           |  | 0.00 ± 0.00 | 0.00 ± 0.00 | 0.00 ± 0.00 | 0.00 ± 0.00 | 0.00 ± 0.00 | 0.00 ± 0.00 | 0.00 ± 0.00 | 0.00 ± 0.00 | 0.00 ± 0.00 |
| 10          |  | 6.90 ± 0.02 | 0.00 ± 0.00 | 0.00 ± 0.00 | 6.36 ± 0.02 | 0.00 ± 0.00 | 0.00 ± 0.00 | 6.35 ± 0.05 | 0.00 ± 0.00 | 0.00 ± 0.00 |
| 100         |  | 7.61 ± 0.02 | 7.55 ± 0.01 | 7.33 ± 0.04 | 7.61 ± 0.01 | 7.34 ± 0.03 | 6.65 ± 0.02 | 7.61 ± 0.02 | 6.79 ± 0.01 | 0.00 ± 0.00 |
| 1000        |  | 7.61 ± 0.01 | 7.52 ± 0.04 | 6.94 ± 0.01 | 7.61 ± 0.02 | 7.65 ± 0.03 | 7.49 ± 0.04 | 7.61 ± 0.02 | 7.40 ± 0.01 | 3.09 ± 0.07 |
| CEO         |  |             |             |             |             |             |             |             |             |             |
|             |  | 4°C         |             |             | 25°C        |             |             | 37°C        |             |             |
| min<br>fold |  | 10          | 20          | 40          | 10          | 20          | 40          | 10          | 20          | 40          |
|             |  |             |             |             |             |             |             |             |             |             |
| 1           |  | 0.00 ± 0.00 | 0.00 ± 0.00 | 0.00 ± 0.00 | 0.00 ± 0.00 | 0.00 ± 0.00 | 0.00 ± 0.00 | 0.00 ± 0.00 | 0.00 ± 0.00 | 0.00 ± 0.00 |
| 10          |  | 6.90 ± 0.02 | 0.00 ± 0.00 | 0.00 ± 0.00 | 6.91 ± 0.01 | 0.00 ± 0.00 | 0.00 ± 0.00 | 6.91 ± 0.01 | 0.00 ± 0.00 | 0.00 ± 0.00 |
| 100         |  | 7.67 ± 0.01 | 7.50 ± 0.03 | 6.90 ± 0.02 | 7.66 ± 0.02 | 5.26 ± 0.20 | 3.78 ± 0.14 | 7.67 ± 0.02 | 4.67 ± 0.15 | 2.93 ± 0.24 |
| 1000        |  | 7.60 ± 0.02 | 7.71 ± 0.03 | 7.79 ± 0.02 | 7.53 ± 0.06 | 7.53 ± 0.06 | 7.63 ± 0.05 | 7.62 ± 0.01 | 7.46 ± 0.04 | 7.85 ± 0.02 |
