# Supplementary material for: Essential Oils of Mentha arvensis and Cinnamomum cassia Exhibit Distinct Antibacterial Activity at Different Temperatures In Vitro and on Chicken Skin
Source: MDPI journal article supplement (doi:10.3390/foods12213938), 2023-10-27
Supplement: s1 [file s1]

## Supplementary material

**Table S1.** Total composition of MEO and CEO.

| No | Compound name                              | RI <sub>Lit.</sub> /RI <sub>Exp.</sub> | MEO, %       | CEO, % |
|----|--------------------------------------------|----------------------------------------|--------------|--------|
| 1  | Tricyclene                                 | 927/929                                | tr.          |        |
| 2  | $\alpha$ -Thujene                          | 930/930                                | 0.02         |        |
| 3  | $\alpha$ -Pinene                           | 939/939                                | 1.07         | 0.10   |
| 4  | Camphene                                   | 954/955                                | 0.02         | 0.07   |
| 5  | Thuja-2,4(10)-diene                        | 960/659                                | tr.          |        |
| 6  | Benzaldehyde                               | 960/960                                |              | 0.10   |
| 7  | Sabinene                                   | 975/974                                | 0.32         |        |
| 8  | $\beta$ -Pinene                            | 979/978                                | 1.06         | 0.04   |
| 9  | 3-Octanone                                 | 983/983                                | 0.01         |        |
| 10 | 6-methyl-5-Hepten-2-one                    | 985/985                                | 0.01         |        |
| 11 | Myrcene                                    | 990/991                                | 0.56         |        |
| 12 | Ethyl hexanol                              | 998/996                                | 0.48         |        |
| 13 | <i>para</i> -Mentha-1(7),8-diene           | 1002/1001                              | 0.07         |        |
| 14 | $\alpha$ -Terpinene                        | 1018/1017                              | 0.01         |        |
| 15 | <i>para</i> -Cymene                        | 1024/1024                              | 0.04         | 0.08   |
| 16 | Limonene                                   | 1029/1030                              | 2.73         | 0.07   |
| 17 | 1,8-Cineole                                | 1031/1031                              | 0.18         |        |
| 18 | ( <i>Z</i> )- $\beta$ -Ocimene             | 1039/1040                              | 0.02         |        |
| 19 | ( <i>E</i> )- $\beta$ -Ocimene             | 1050/1050                              | 0.02         |        |
| 20 | Bergamal                                   | 1050/1051                              | tr.          |        |
| 21 | $\gamma$ -Terpinene                        | 1059/1059                              | 0.02         |        |
| 22 | ( <i>Z</i> )-Sabinene hydrate              | 1070/1071                              | 0.01         |        |
| 23 | ( <i>Z</i> )-Linalool oxide                | 1071/1072                              | 0.05         |        |
| 24 | Terpinolene                                | 1088/1088                              | 0.03         |        |
| 25 | <i>para</i> -Cymenene                      | 1091/1092                              | 0.01         |        |
| 26 | Linalool                                   | 1096/1096                              | 0.22         |        |
| 27 | ( <i>Z</i> )-Rose oxide                    | 1108/1109                              | tr.          |        |
| 28 | $\beta$ -Thujone                           | 1114/1118                              | 0.01         |        |
| 29 | ( <i>Z</i> )- <i>para</i> -Menth-2-en-1-ol | 1124/1124                              | 0.02         |        |
| 30 | ( <i>E</i> )-Rose oxide                    | 1125/1125                              | 0.01         |        |
| 31 | (3 <i>Z</i> )-Hexenyl isobutanoate         | 1146/1146                              | 0.02         |        |
| 32 | Isopulegone                                | 1149/1150                              | 0.93         |        |
| 33 | <b>Menthone</b>                            | 1152/1152                              | <b>7.90</b>  |        |
| 34 | <b>Isomenthone</b>                         | 1162/1162                              | <b>6.42</b>  |        |
| 35 | Borneol                                    | 1169/1169                              |              | 0.23   |
| 36 | <b>Menthol</b>                             | 1171/1172                              | <b>68.61</b> |        |
| 37 | $\alpha$ -Terpineol                        | 1188/1188                              | 0.41         |        |
| 38 | Decanal                                    | 1201/1200                              | 0.10         |        |
| 39 | Octyl acetate                              | 1214/1214                              | 0.11         |        |
| 40 | 4-methyl-dec-3-en-5-ol                     | /1216                                  | 0.08         |        |
| 41 | ( <i>E</i> )-Carveol                       | 1216/1219                              | 0.03         |        |
| 42 | Citronellol                                | 1225/1225                              | 0.48         |        |
| 43 | (3 <i>Z</i> )-Hexenyl 2-methyl butanoate   | 1232/1232                              | 0.51         |        |
| 44 | Pulegone                                   | 1237/1236                              | 0.37         |        |
| 45 | Carvone                                    | 1243/1243                              | 0.02         |        |

|    |                                   |           |      |              |
|----|-----------------------------------|-----------|------|--------------|
| 46 | Geraniol                          | 1252/1258 | 2.01 |              |
| 47 | Geranial                          | 1268/1268 | 0.23 |              |
| 48 | <b>(E)-Cinnamaldehyde</b>         | 1270/1271 |      | <b>83.32</b> |
| 49 | Neomenthyl acetate                | 1271/1272 | 0.15 |              |
| 50 | Lavandulyl acetate                | 1271/1273 | 0.04 |              |
| 51 | Menthyl acetate                   | 1295/1295 | 2.10 |              |
| 52 | Carvacrol                         | 1299/1300 | 0.02 |              |
| 53 | Geranyl formate                   | 1300/1301 | 0.01 |              |
| 54 | Isomenthyl acetate                | /1338     | 0.11 |              |
| 55 | Dihydro carveol acetate           | 1344/1343 | 0.04 |              |
| 56 | Citronellyl acetate               | 1350/1350 | 0.18 |              |
| 57 | Eugenol                           | 1359/1359 | 0.04 |              |
| 58 | Cyclosativene                     | 1371/1370 |      | 0.05         |
| 59 | Unknown                           | /1371     |      | 0.19         |
| 60 | $\alpha$ -Copaene                 | 1375/1375 | 0.01 | 0.75         |
| 61 | Geranyl acetate                   | 1379/1379 | 0.18 |              |
| 62 | (3Z)-Hexenyl-(3Z)-hexanoate       | 1380/1380 | 0.01 |              |
| 63 | $\beta$ -Bourbonene               | 1388/1388 | 0.17 | 0.02         |
| 64 | $\beta$ -Elemene                  | 1390/1390 | 0.09 | 0.02         |
| 65 | Decyl acetate                     | 1404/1404 | 0.11 |              |
| 66 | $\alpha$ -Cedrene                 | 1411/1409 |      | 0.01         |
| 67 | (Z)- $\alpha$ -Bergamotene        | 1416/1416 |      | 0.02         |
| 68 | (E)-Caryophyllene                 | 1419/1419 | 0.40 | 0.18         |
| 69 | $\beta$ -Copaene                  | 1432/1433 | 0.03 |              |
| 70 | (E)- $\alpha$ -Bergamotene        | 1434/1434 |      | 0.07         |
| 71 | Aromadendrene                     | 1440/1440 |      | 0.03         |
| 72 | (E)-Cinnamyl acetate              | 1446/1445 |      | 4.69         |
| 73 | $\alpha$ -Humulene                | 1454/1454 | 0.05 | 0.02         |
| 74 | $\beta$ -Santalene                | 1459/1459 |      | 0.03         |
| 75 | Alloaromadendrene                 | 1460/1460 |      | 0.05         |
| 76 | $\gamma$ -Muurolene               | 1477/1478 | 0.02 | 0.17         |
| 77 | $\alpha$ -Curcumene               | 1480/1480 |      | 0.11         |
| 78 | Germacrene D                      | 1481/1483 | 0.18 |              |
| 79 | $\beta$ -Selinene                 | 1490/1490 |      | 0.03         |
| 80 | 10,11-epoxy-Calamenene            | 1492/1491 |      | 0.02         |
| 81 | Viridiflorene                     | 1496/1467 |      | 0.09         |
| 82 | Bicyclogermacrene                 | 1500/1500 | 0.02 |              |
| 83 | $\alpha$ -Muurolene               | 1500/1500 | 0.02 | 0.14         |
| 84 | $\beta$ -Bisabolene               | 1505/1503 |      | 0.19         |
| 85 | $\gamma$ -Cadinene                | 1513/1512 | 0.05 | 0.11         |
| 86 | $\delta$ -Cadinene                | 1523/1523 | 0.07 | 0.28         |
| 87 | (E)- $\gamma$ -Bisabolene         | 1528/1528 |      | 0.16         |
| 88 | <b>(E)-methoxy-Cinnamaldehyde</b> | 1528/1529 |      | <b>7.62</b>  |
| 89 | $\alpha$ -Cadinene                | 1538/1538 | 0.01 |              |
| 90 | $\alpha$ -Elemol                  | 1549/1549 | 0.07 |              |
| 91 | (E)-Nerolidol                     | 1563/1563 | 0.03 | 0.10         |
| 92 | Spathulenol                       | 1578/1578 | 0.04 | 0.10         |
| 93 | Caryophyllene oxide               | 1583/1583 | 0.09 | 0.08         |
| 94 | Tetradecanal                      | 1612/1612 |      | 0.04         |
| 95 | 1,10-di- <i>epi</i> -Cubenol      | 1619/1620 |      | 0.03         |

|              |                                             |           |              |              |
|--------------|---------------------------------------------|-----------|--------------|--------------|
| 96           | $\gamma$ -Eudesmol                          | 1632/1632 | 0.01         |              |
| 97           | Caryophylla-4(12),8(13)-dien-5 $\alpha$ -ol | 1636/1636 |              | 0.02         |
| 98           | T-Muurolol                                  | 1642/1642 | 0.02         | 0.04         |
| 99           | $\alpha$ -Muurolol                          | 1646/1645 |              | 0.01         |
| 100          | $\beta$ -Eudesmol                           | 1645/1646 | 0.01         |              |
| 101          | $\alpha$ -Cadinol                           | 1650/1650 | 0.04         | 0.02         |
| 102          | Agerochromene                               | /1662     | 0.01         |              |
| 103          | $\alpha$ -Bisabolol                         | 1685/1686 |              | 0.04         |
| 104          | Rimuene                                     | 1896/1895 |              | 0.06         |
| 105          | Luxuriadiene                                | 2006/2010 |              | 0.06         |
| <b>Total</b> |                                             |           | <b>99.66</b> | <b>99.10</b> |

RI<sub>Lit</sub>: Kovat's indices for non-polar column DB-5 taken from the literature [35]; RI<sub>Exp</sub>: Kovat's indices determined experimentally on the non-polar column Rxi-5MS (Restek. USA); bolded compounds are those whose amounts were more than 5 %; tr. – trace amount, less than 0.01
